# Supplementary material for: Keratinocyte-derived S100A9 modulates neutrophil infiltration and affects psoriasis-like skin and joint disease
Source: HighWire-hosted journal article supplement (doi:10.1136/annrheumdis-2022-222229), 2022-07-04

**A**

|             |                                                                                                      |
|-------------|------------------------------------------------------------------------------------------------------|
| <b>DKO*</b> | <i>cJun<sup>lox/lox</sup>; JunB<sup>lox/lox</sup>; S100A9<sup>+/+</sup>; K5Cre<sup>ERT</sup></i>     |
| <b>TKO*</b> | <i>cJun<sup>lox/lox</sup>; JunB<sup>lox/lox</sup>; S100A9<sup>lox/lox</sup>; K5Cre<sup>ERT</sup></i> |

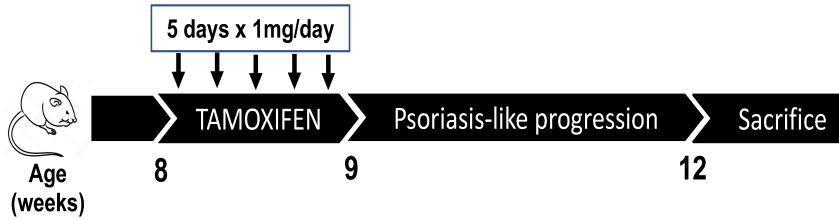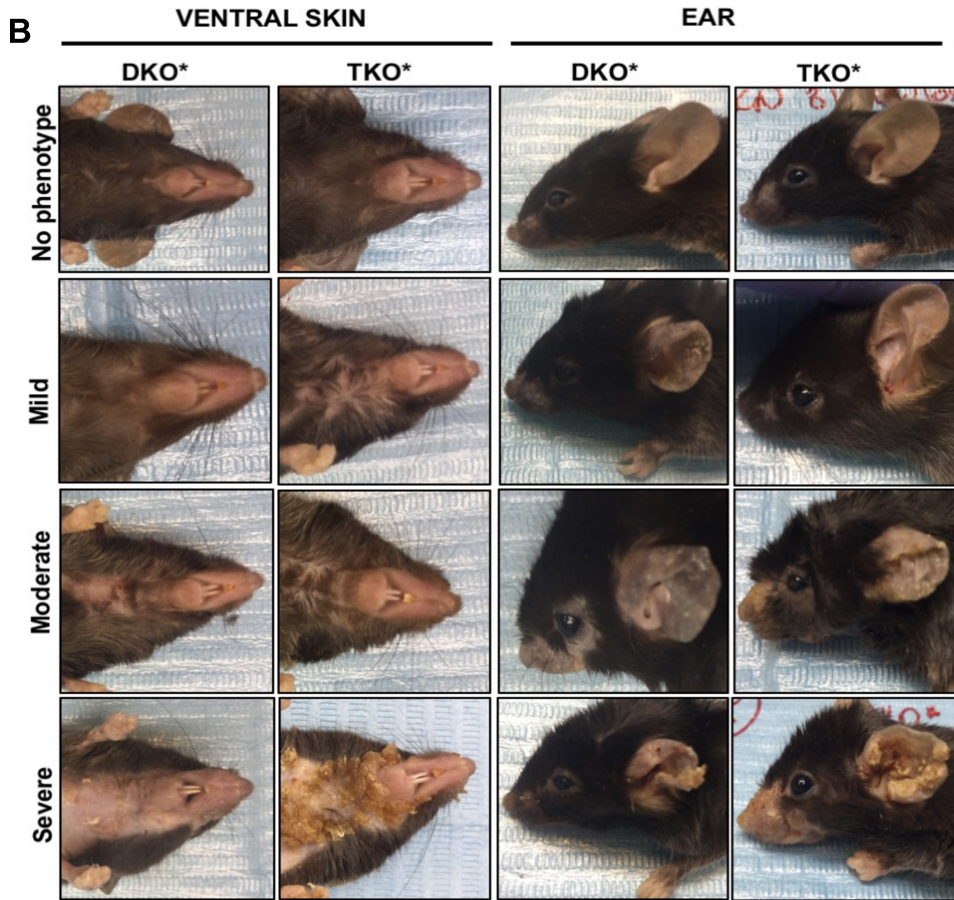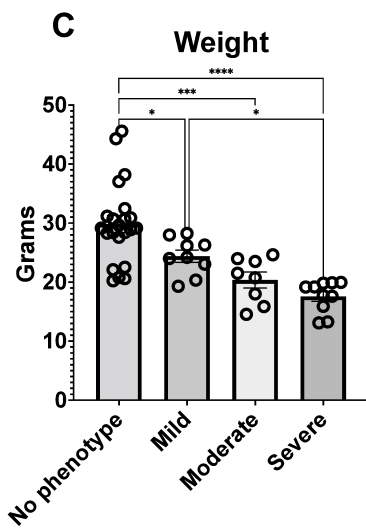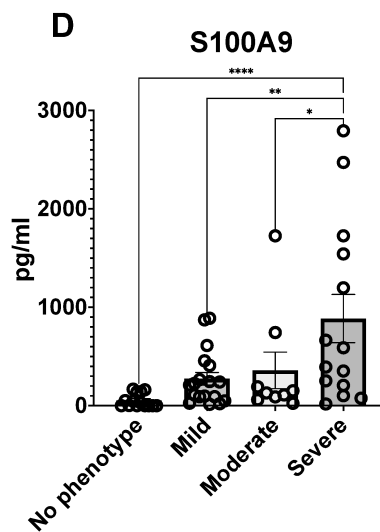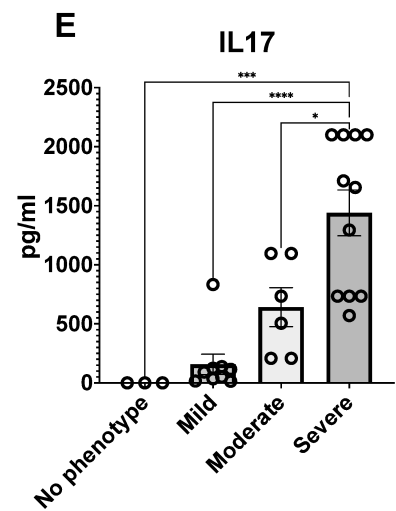

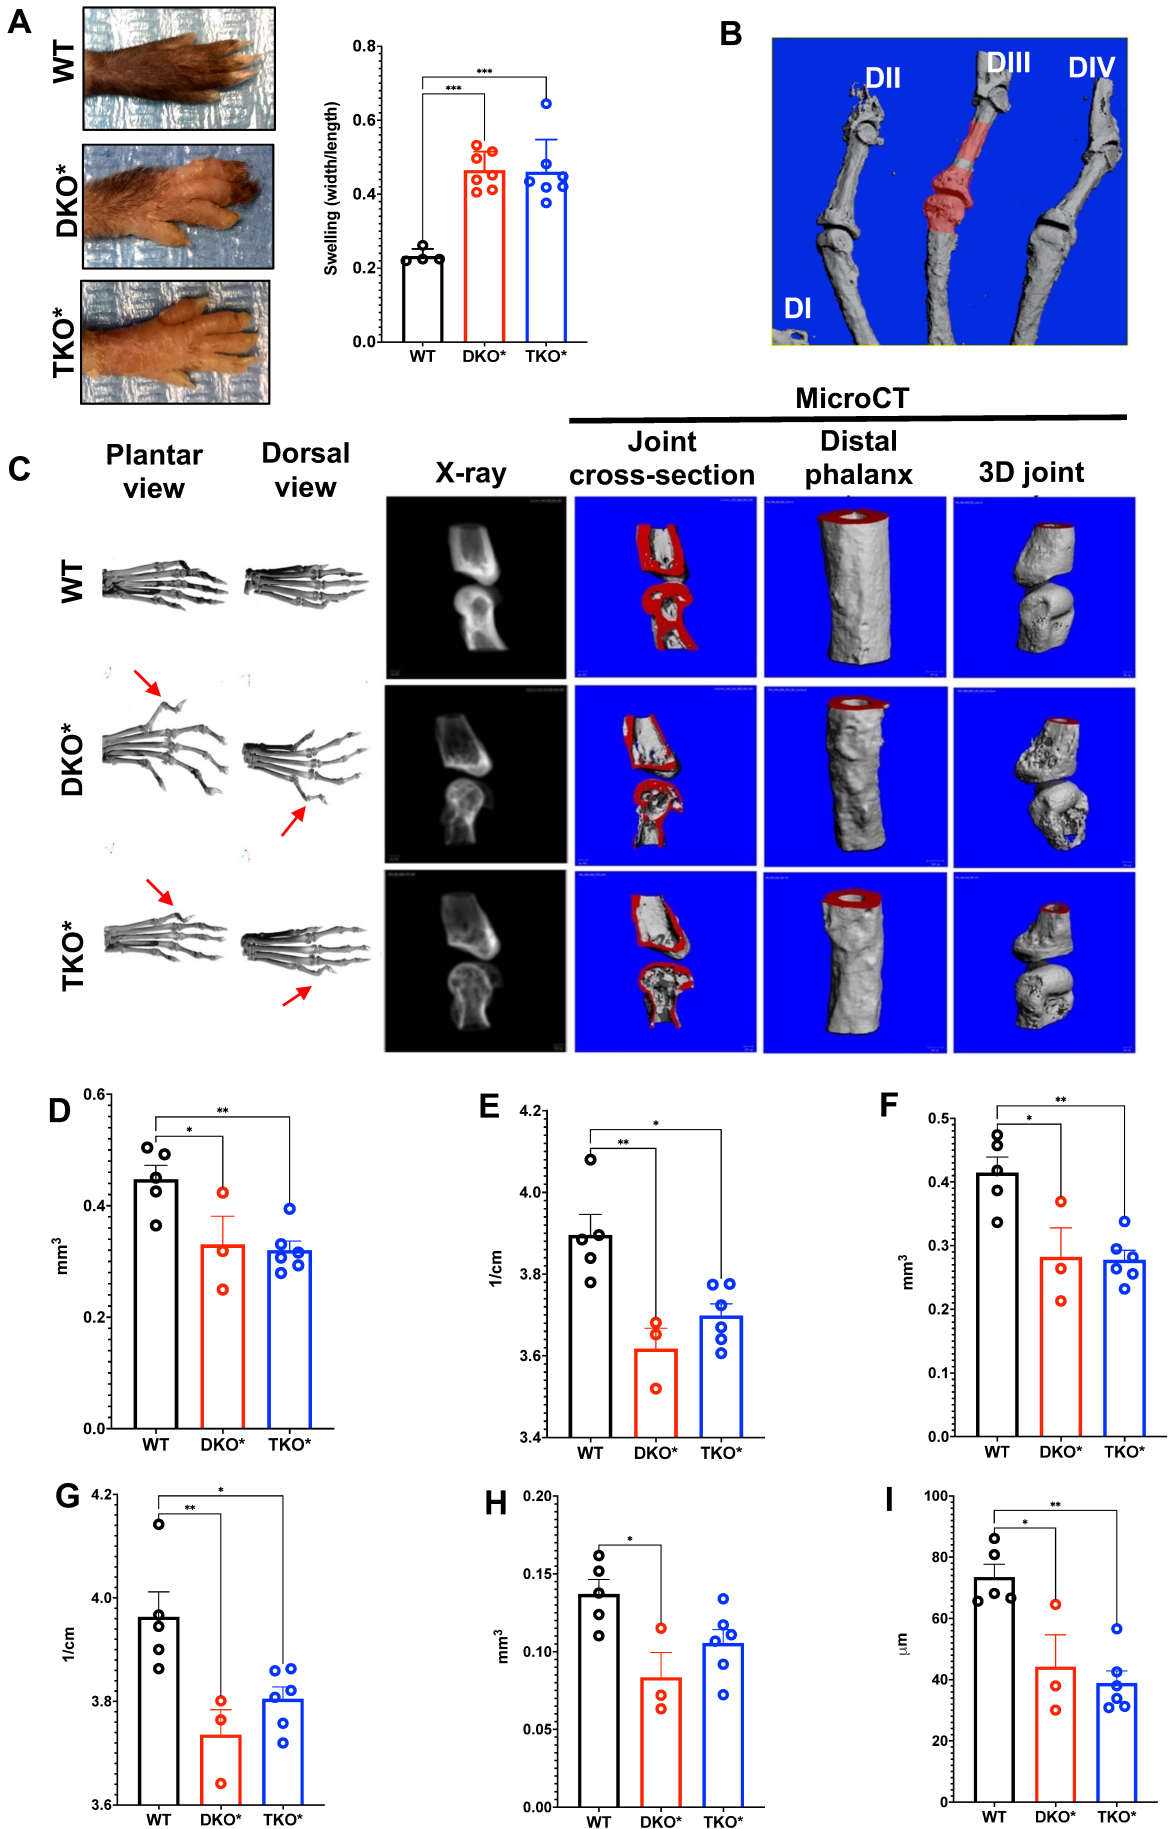



**A**

DKO\* vs WT\*

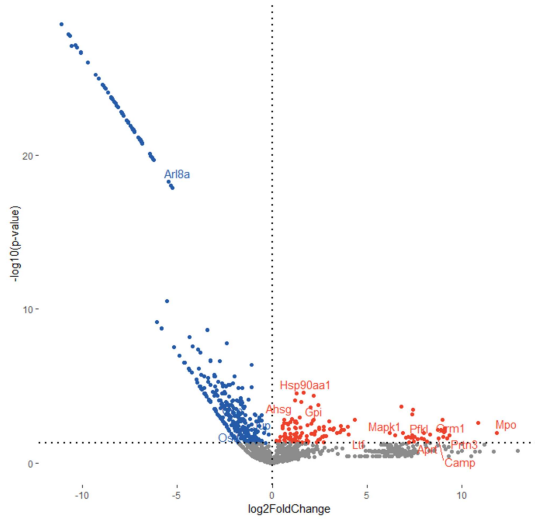

**B**

TKO\* vs WT\*

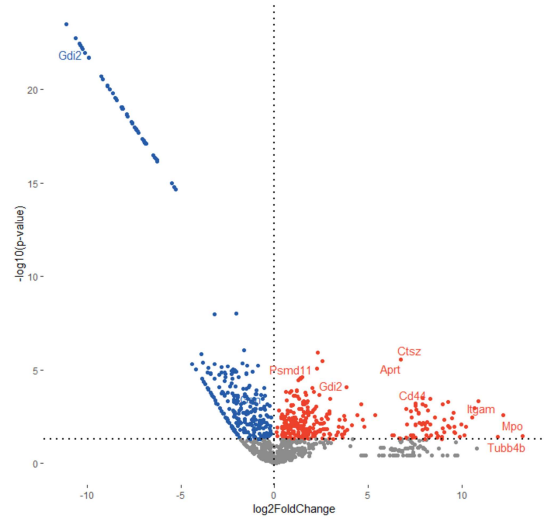

**C**

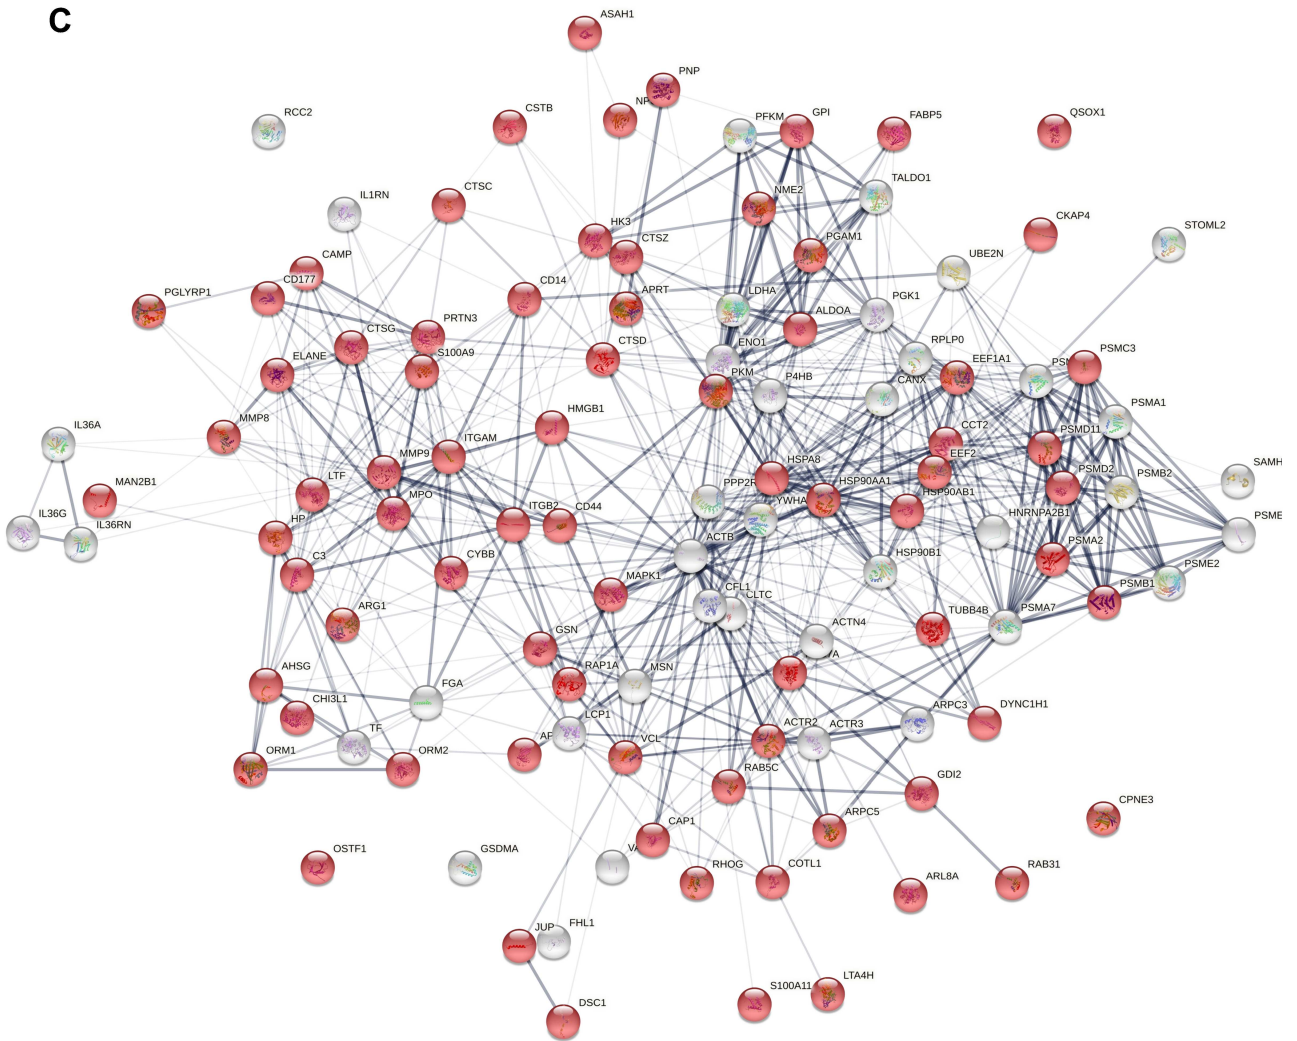

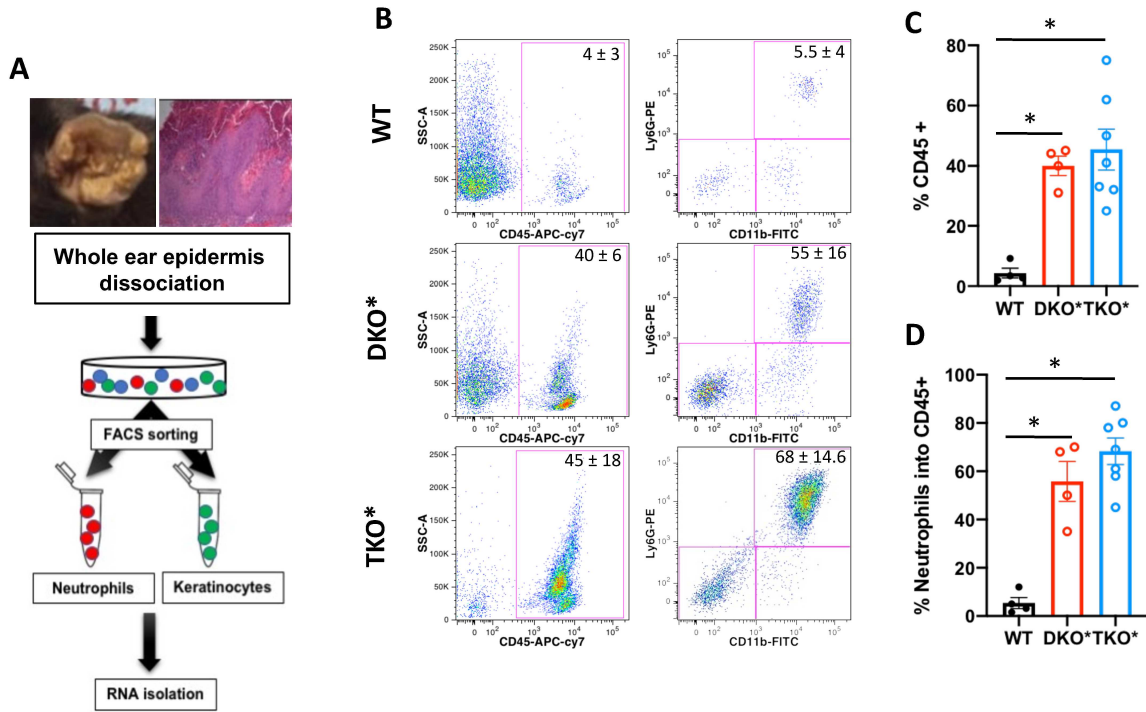

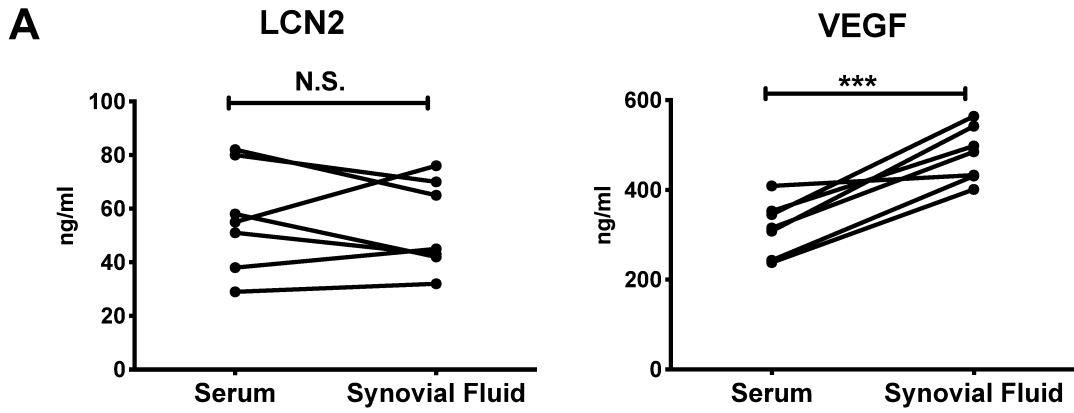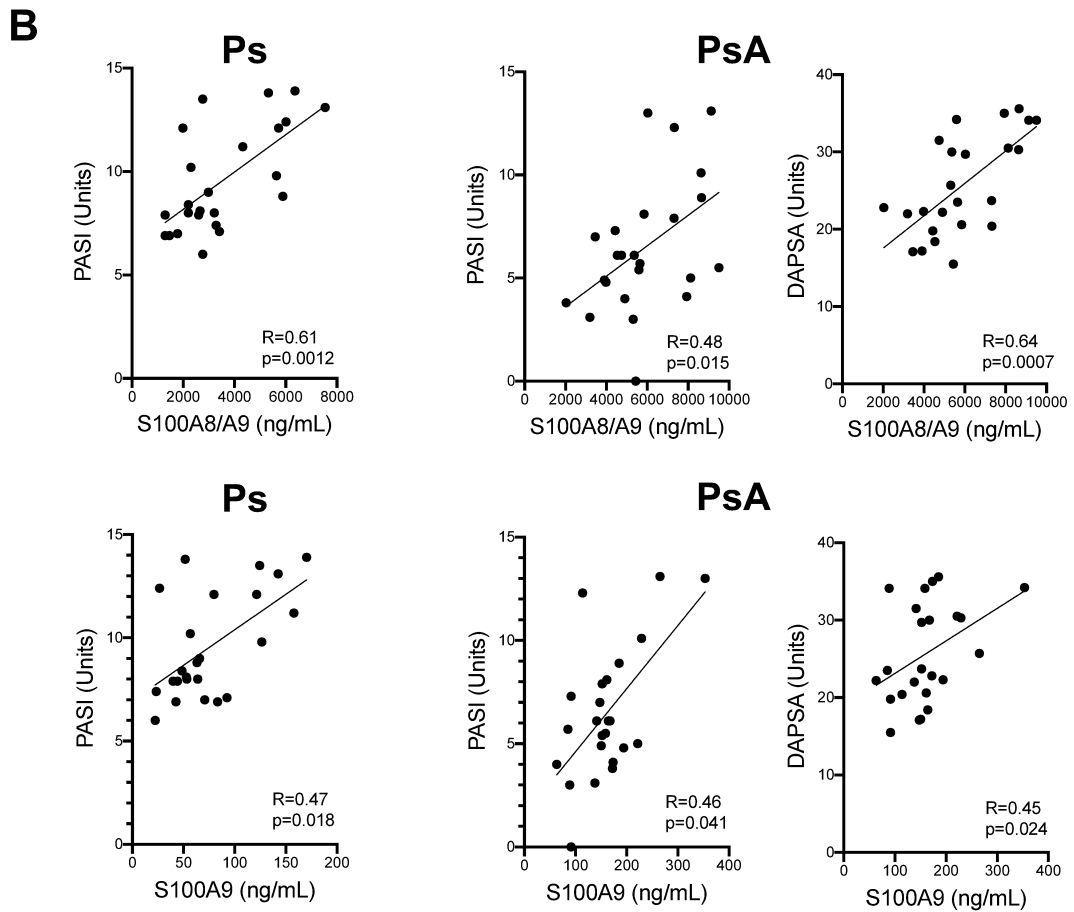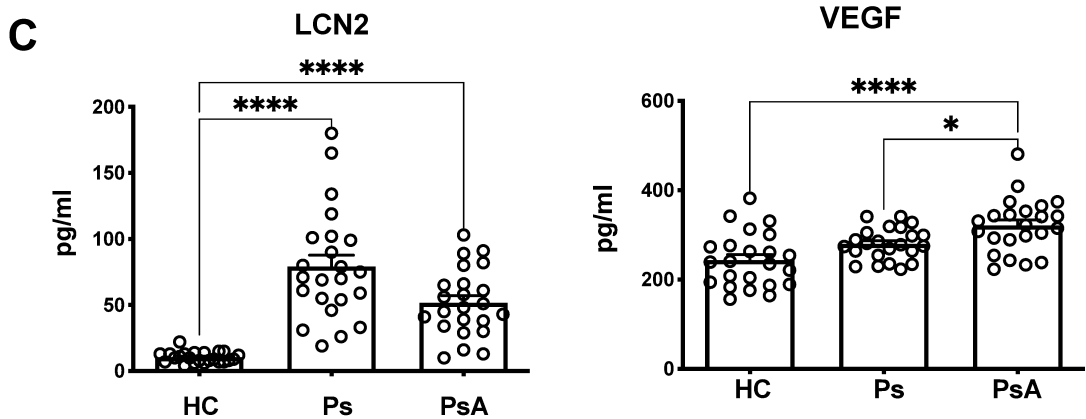

Supplement: annrheumdis-2022-222229supp002_data_supplement.pdf [file annrheumdis-2022-222229supp002_data_supplement.pdf]
